# Supplementary material for: MoS2 nanohybrid as a fluorescence sensor for highly selective detection of dopamine
Source: Royal Society of Chemistry journal article supplement (doi:10.1039/c7an01770g), 2018-01-01
Supplement: c7an01770g1.pdf [file c7an01770g1.pdf]

## Electronic Supplementary Information

# MoS<sub>2</sub> nanohybrid as a fluorescence sensor for highly selective detection of dopamine

*Neema Pallikarathodi Mani, Manjunatha Ganiga and Jobin Cyriac\**

Department of Chemistry, Indian Institute of Space Science and Technology

Thiruvananthapuram – 695 547, INDIA

Email: [jobincyriac@iist.ac.in](mailto:jobincyriac@iist.ac.in)

| Sl. No. | Content                                                                                                                                                 | Page No: |
|---------|---------------------------------------------------------------------------------------------------------------------------------------------------------|----------|
| 1       | Materials and Methods                                                                                                                                   | S1       |
| 2       | UV- visible absorption spectra and PL emission spectra of MoS <sub>2</sub> QDNS and the TEM                                                             | S2       |
| 3       | Sensitivity study at lower range                                                                                                                        | S3       |
| 4       | Comparison of absorbance spectra of DA at pH 5.5 and 13, MoS <sub>2</sub> QDNS and MoS <sub>2</sub> QDNS–DA solution                                    | S3       |
| 5       | Mass spectra of DA at pH 5.5 and 13                                                                                                                     | S4       |
| 6       | Comparison of IR spectra of DA at pH 5.5 and 13.                                                                                                        | S5       |
| 7       | Comparison of PL intensity of fluorophore with and without quencher at three different excitation wavelengths and spectral overlap at these wavelengths | S5       |
| 8       | Spectral overlap of absorption spectra of AA and UA in MoS <sub>2</sub> QDNS with the emission spectra of MoS <sub>2</sub> QDNS                         | S6       |
| 9       | Absorption spectra of DA at different pH and Response of DA towards the PL emission of MoS <sub>2</sub> QDNS at different pH                            | S6       |
| 10      | Scheme of oxidation pathway of DA                                                                                                                       | S7       |
| 11      | The lifetime results                                                                                                                                    | S8       |
| 12      | Comparison of different methods reported in literature                                                                                                  | S9       |

## Materials and Methods

**Materials and Reagents:** MoS<sub>2</sub> powder, Dopamine (DA), Adenine (Ade), Tyrosine (Tyr) were purchased from Sigma-Aldrich, USA. Fructose (Fru), Galactose (Gal), Creatinine (Cre), Thymine (Thy), Uric acid (UA) were purchased from SRL Pvt. Ltd, India. Tryptophan(Try), Tyramine (Tym), Cadmium chloride (CdCl<sub>2</sub>) were purchased from Alfa Aesar, UK. Lead nitrate (PbNO<sub>3</sub>) was purchased from Otto Chemicals, India. Glucose (Glu), Glutathione (GSH), Cobalt sulphate (CoSO<sub>4</sub>), Ascorbic acid (AA), Tin chloride (SnCl<sub>2</sub>), Lysin (Lys), glycine (Gly), Sodium carbonate(NaCO<sub>3</sub>), Potassium chloride (KCl), Silver nitrate

(AgNO<sub>3</sub>), Ferrous sulphate (FeSO<sub>4</sub>), Ferric chloride (FeCl<sub>3</sub>), Nickel sulphate (NiSO<sub>4</sub>), Copper sulphate (CuSO<sub>4</sub>), Magnesium sulphate (MgSO<sub>4</sub>), Calcium carbonate (CaCO<sub>3</sub>), Aluminum nitrate Al<sub>2</sub>(NO)<sub>3</sub>, Zinc Sulphate (ZnSO<sub>4</sub>) Sodium hydroxide (NaOH), Hydrochloric acid (HCl) were from Merck, India. Double distilled water was used throughout the experiments. All reagents purchased were of analytical grade and used without further purification.

**Characterization:** UV-visible experiments were done using a Carry-100 UV-visible spectrophotometer. Fluorescence measurements were carried out using FluoroMax-4C spectrofluorometer (Horiba Instruments, USA), by fixing excitation and emission slit width at 5 nm with an integration time of 0.1 ns. Time resolved fluorescence measurements were executed using time-correlated single-photon counting (TCSPC). For TCSPC measurements, excitation wavelength was fixed at 330 nm and decay profile were collected at 415 nm (laser pulse width <1ns). FTIR spectra were recorded/acquired in a Spectrum 100T Perkin-Elmer FTIR spectrometer in transmission mode by KBr pellet method. pH measurements were conducted using EUTECH instruments' pH meter. Zeta potential measurements were carried out using Zetasizer Nano ZS series; Malvern Instruments, Malvern, UK. Mass spectra was recorded in a Bruker Q-TOF (COMPACT) mass spectrometer. Methanol-water mixture (50:50) was used as the electrospray solvent.

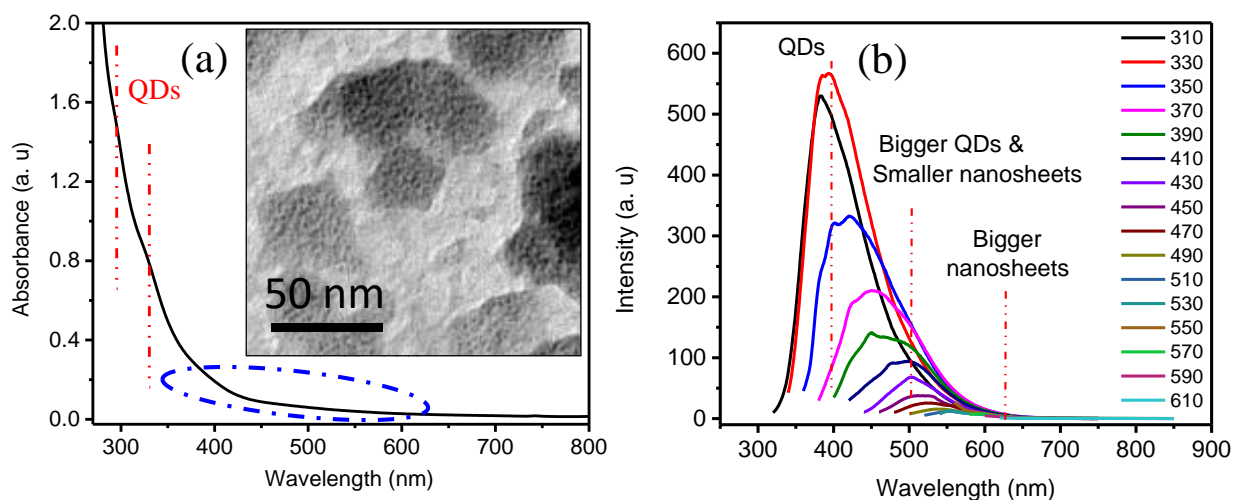

**Fig. S1.** (a) UV-visible absorption spectrum of MoS<sub>2</sub> QDNS shows the absorption features for QDs and nanosheets. Inset shows the TEM image of MoS<sub>2</sub> QDNS in which nanosheets and QDs are visible (b) Excitation dependent emission spectra of MoS<sub>2</sub> QDNS depicts three region of emission that corresponds to QDs, bigger QDs, nanosheets and bigger nanosheets.

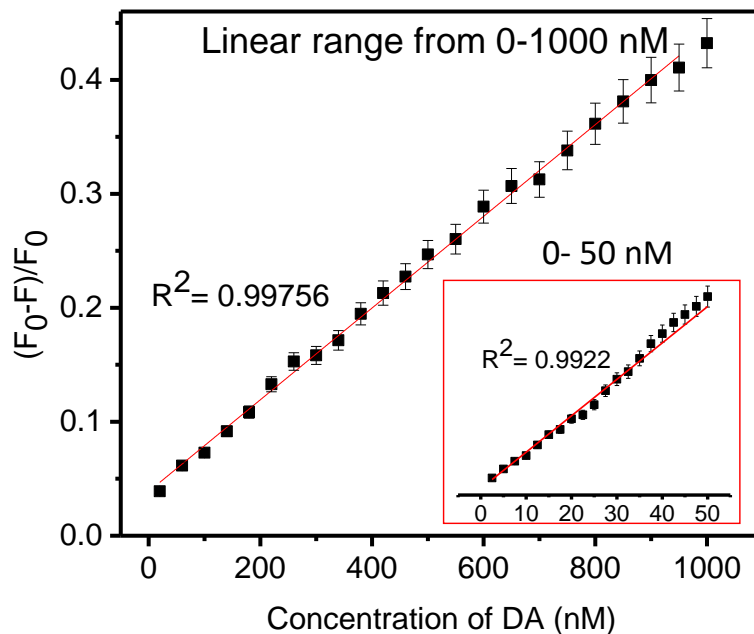

**Fig. S2.** Plot obtained for the quenching of PL intensity of MoS<sub>2</sub> QDNS by nanomolar concentrations of DA (20–1000 nM). Inset shows the linear range obtained by addition of 2.5 nM to 50 nM concentration of DA. Deviation from the mean of values obtained from repeated experiments are represented as error bars.

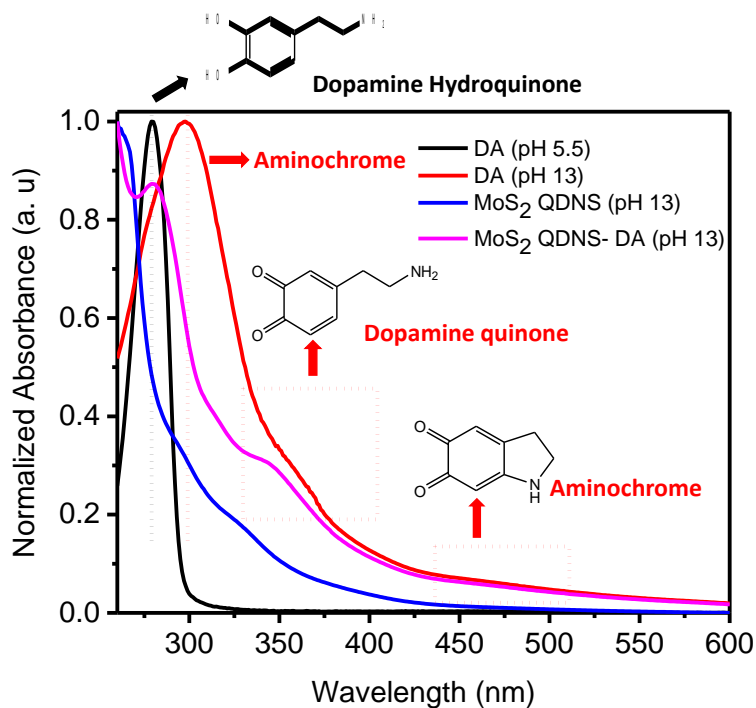

**Fig. S3.** Absorption spectra of DA as such, DA at pH 13, MoS<sub>2</sub> QDNS and MoS<sub>2</sub> QDNS- DA solutions.

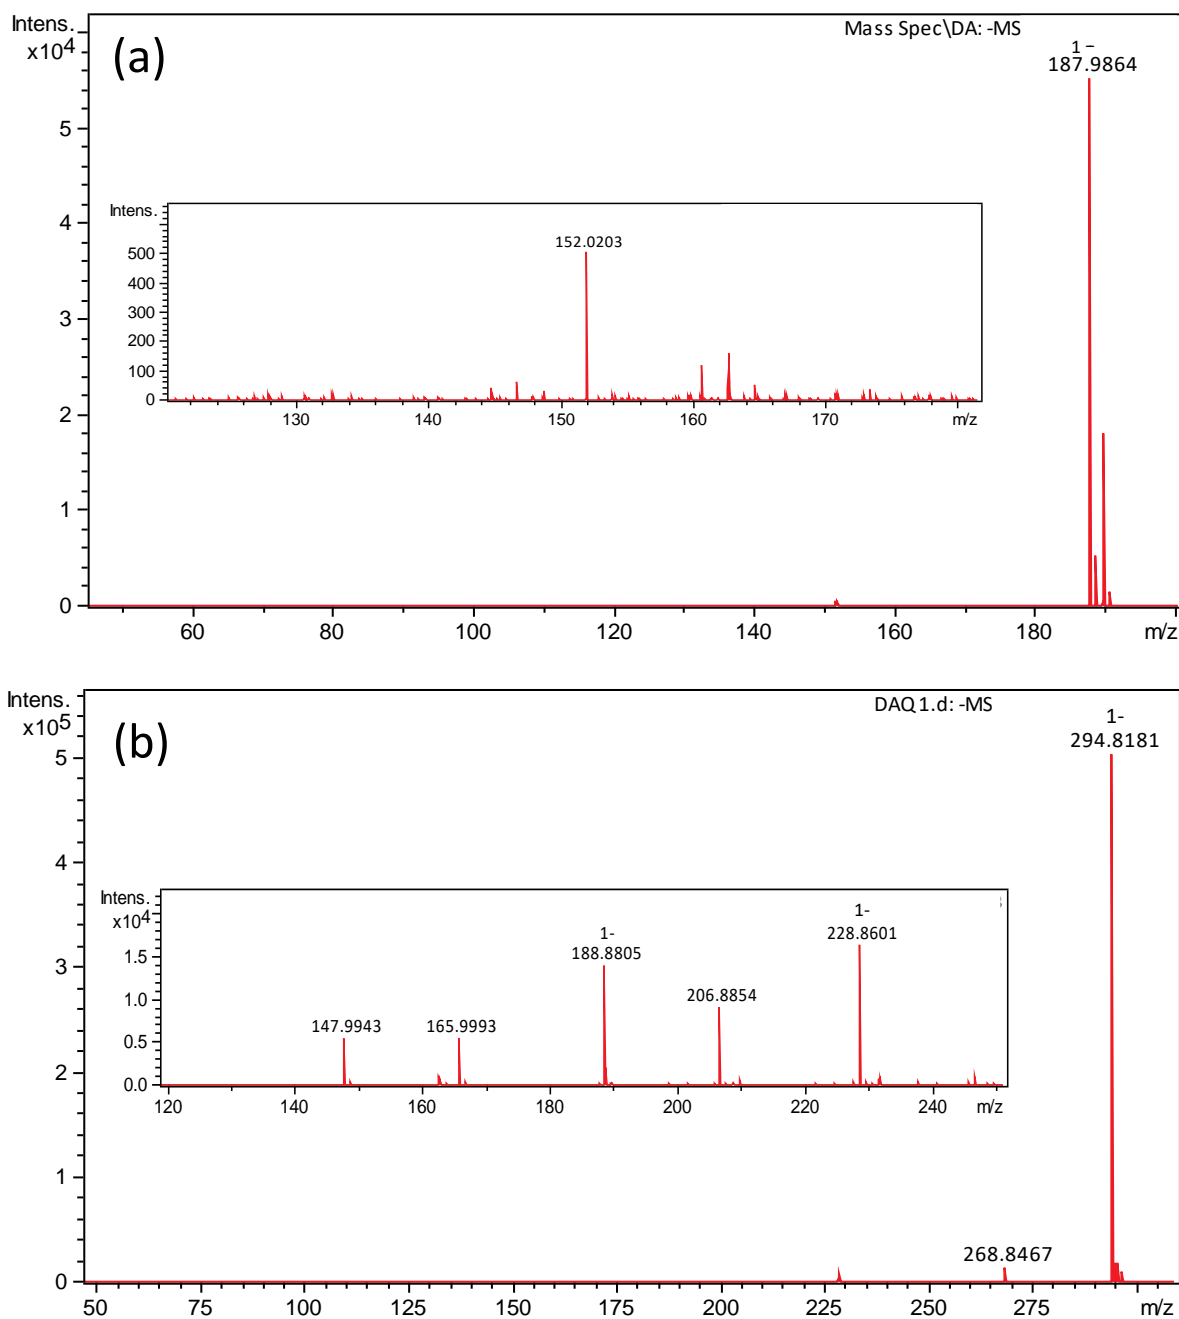

**Fig. S4:** Mass spectra of (a) DA in acidic media (pH 5.5) showing (M-H)<sup>-</sup> peak for dopamine hydrochloride (m/z 188) and that of dopamine (m/z 152) and (b) dopamine in alkaline media (pH 13) showing peaks for oxidized forms of DA such as aminochrome (m/z 148) and its dimer form (m/z 295). All MS spectra were collected in negative ion mode.

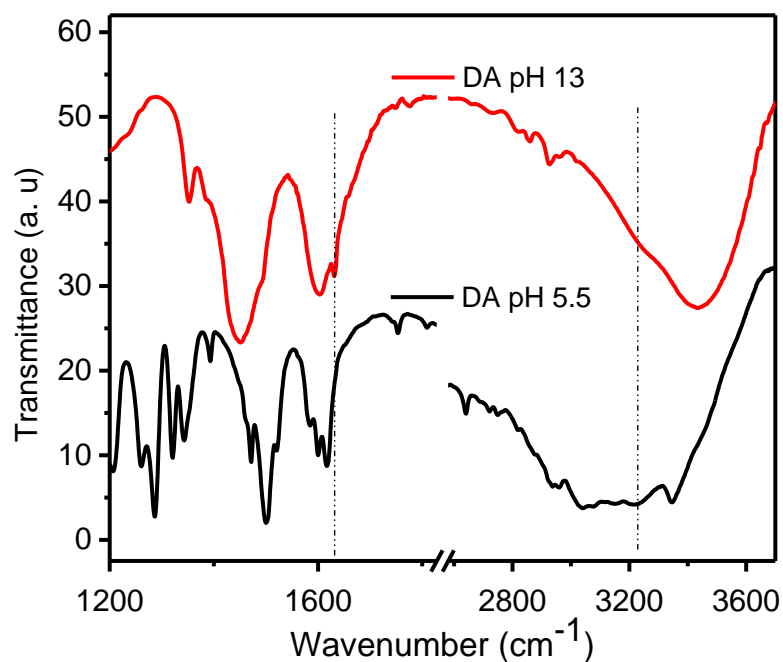

**Fig. S5:** Comparative IR spectra of DA at pH 13 and DA as such (pH 5.5).

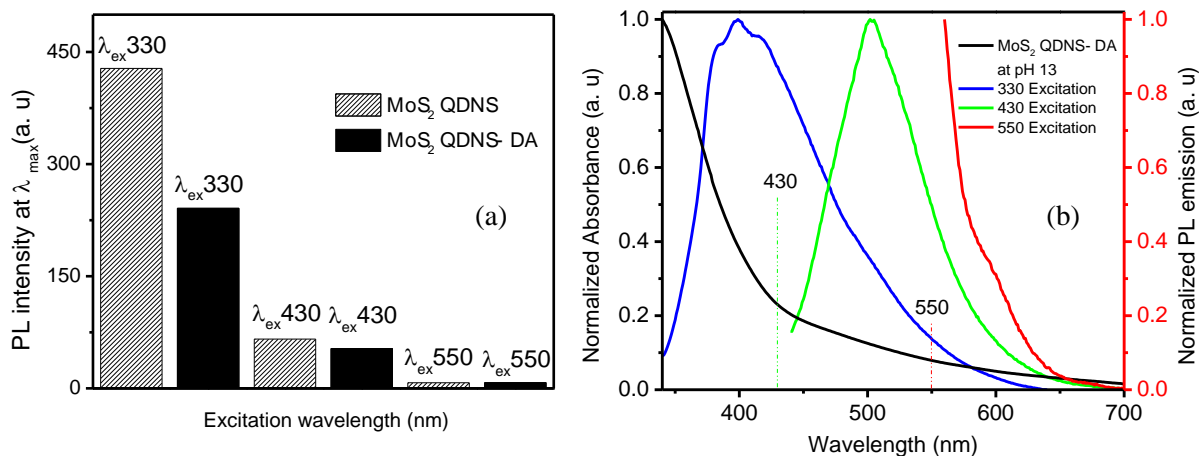

**Fig. S6 (a)** Comparison of PL intensity of MoS<sub>2</sub> QDNS and MoS<sub>2</sub> QDNS-DA complex at different excitation wavelength. **(b)** Spectral overlap of absorption spectra of MoS<sub>2</sub> QDNS-DA solution (black) to that of PL spectra of MoS<sub>2</sub> QDNS excited at different wavelength (330, 430 and 550 nm).

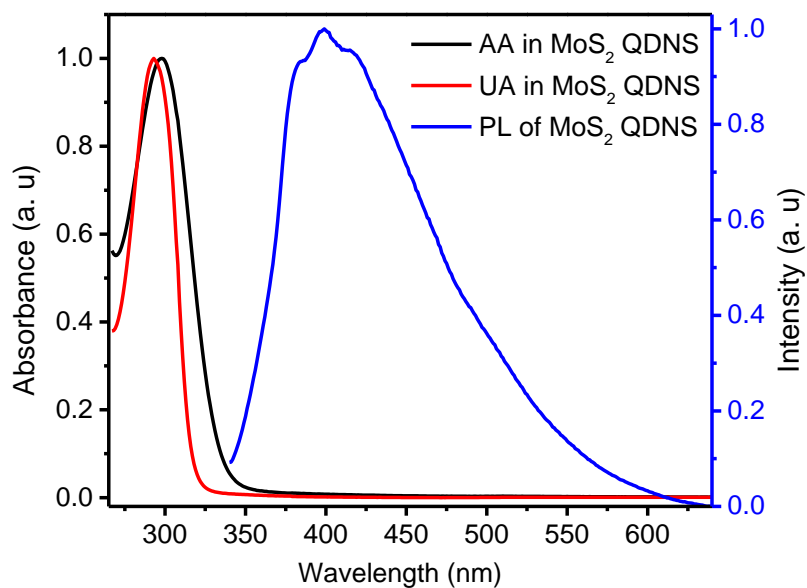

**Fig. S7.** Absorption spectra of AA and UA in MoS<sub>2</sub> QDNS along with the PL spectra of MoS<sub>2</sub> QDNS at pH 13 showing zero overlap.

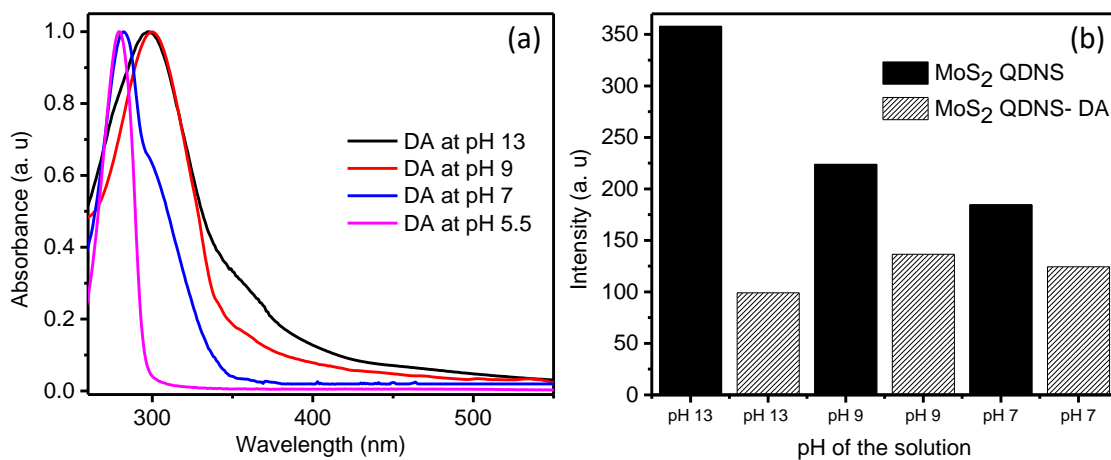

**Fig. S8:** **a)** UV- Vis absorption spectra of DA at different pH, showing a shift in peak position, as DA changes from hydroquinone form (acidic pH) to different oxidized form (neutral and basic pH). **b)** The response of DA towards PL emission of MoS<sub>2</sub> QDNS at pH 13, 9, and 7.

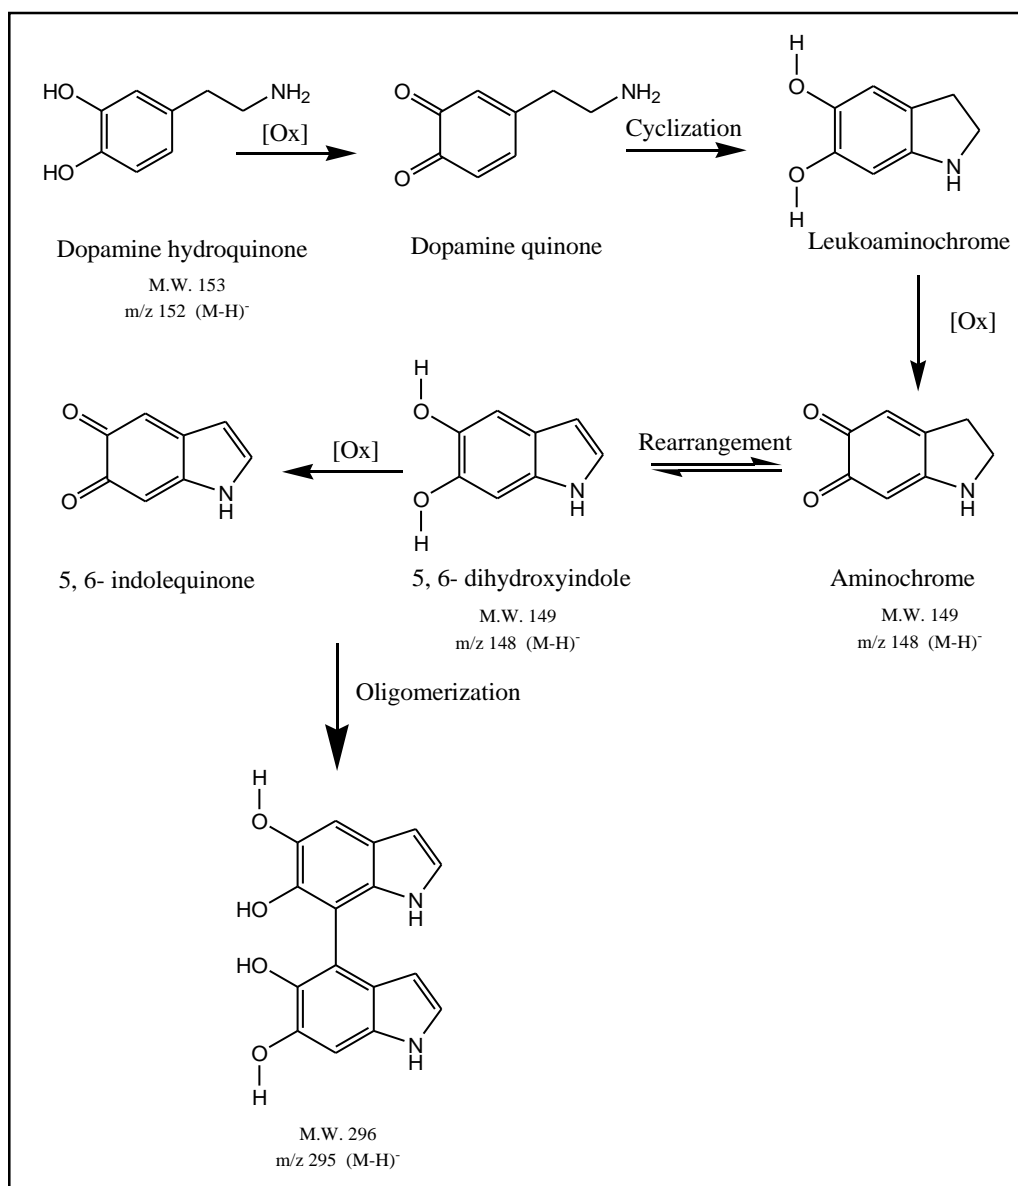

**Scheme S1:** Oxidation pathway of dopamine<sup>1-6</sup>.

| System                | $\tau_1$<br>(ns) | $\alpha_1$<br>(%) | $\tau_2$<br>(ns) | $\alpha_2$<br>(%) | $\tau_3$<br>(ns) | $\alpha_3$<br>(%) | $\langle\tau\rangle$<br>(ns) | $\chi^2$ |
|-----------------------|------------------|-------------------|------------------|-------------------|------------------|-------------------|------------------------------|----------|
| MoS <sub>2</sub> QDNS | 1.05             | 29.67             | 5.55             | 38.66             | 29.18            | 31.67             | 32.89                        | 1.2      |
| 0.2 $\mu$ M of DA     | 0.83             | 31.91             | 5.06             | 36.40             | 28.27            | 31.87             | 32.62                        | 1.2      |
| 0.4 $\mu$ M           | 0.60             | 37.98             | 4.52             | 32.44             | 27.44            | 29.58             | 30.20                        | 1.2      |
| 0.6 $\mu$ M           | 0.56             | 42.83             | 4.32             | 28.85             | 26.46            | 28.32             | 28.78                        | 1.2      |
| 0.8 $\mu$ M           | 0.54             | 45.20             | 4.16             | 27.35             | 25.78            | 27.45             | 27.94                        | 1.2      |
| 1.0 $\mu$ M           | 0.51             | 48.53             | 3.98             | 24.74             | 24.33            | 26.73             | 27.17                        | 1.1      |
| 1.2 $\mu$ M           | 0.50             | 51.77             | 3.87             | 22.99             | 23.84            | 25.23             | 25.91                        | 1.1      |
| 1.4 $\mu$ M           | 0.50             | 54.45             | 3.88             | 21.31             | 22.48            | 24.25             | 25.13                        | 1.09     |
| 1.6 $\mu$ M           | 0.48             | 56.28             | 3.62             | 20.09             | 21.74            | 23.62             | 24.64                        | 1.1      |
| 1.8 $\mu$ M           | 0.45             | 58.89             | 3.21             | 18.47             | 19.80            | 22.65             | 23.98                        | 1.1      |
| 2.0 $\mu$ M           | 0.45             | 61.00             | 3.14             | 16.85             | 18.82            | 22.15             | 23.73                        | 1.02     |

**Table S1.** The lifetime components of MoS<sub>2</sub> QDNS and MoS<sub>2</sub> QDNS-DA, showing concentration dependent lifetime values. All decay profiles are fitted into tri-exponential functions. Decrease in all the components and average lifetime values of MoS<sub>2</sub> QDNS-DA complex implies to the interaction of excited state MoS<sub>2</sub> QDNS with DA. (Excitation was at 344 nm and the emission was collected at 415 nm).



| Method                                 | Sensor System                                                                                                            | LOD                                       | Reference     |
|----------------------------------------|--------------------------------------------------------------------------------------------------------------------------|-------------------------------------------|---------------|
| Colorimetry                            | 40-aminobenzo-18-crown-6 (ABCE) and 4-mercaptophenyl boronic acid (MPBA) modified Au nanoparticles.                      | 46 nM                                     | 7             |
| Electrochemistry                       | Thin layer of poly(tetrafluoroethylene) (PTFE) with nanoparticle arrays and an aluminum film                             | 0.5 $\mu$ M<br>10 $\mu$ M–1 nM<br>(S/N=3) | 8             |
| Electrochemistry                       | GS-Au <sub>25</sub> modified sol–gel electrode                                                                           | 0.30 $\mu$ M                              | 9             |
| Electrochemistry<br>(Enzyme catalyzed) | Glassy carbon electrodes were modified by laccase.                                                                       | 10 nM                                     | 10            |
| Electrochemistry<br>(Enzyme catalyzed) | carbon fiber microelectrode modified with tyrosinase immobilized in chitosan and ceria-based metal oxides                | 1 nM                                      | 11            |
| Fluorimetry                            | Mono-6-amino- $\beta$ -cyclodextrin (NH <sub>2</sub> - $\beta$ -CD) functionalised gold nanoclusters ( $\beta$ -CD-AuNC) | 2 nM<br>5–1000 nM<br>(S/N=3)              | 12            |
| Fluorimetry                            | Water-soluble silicon nanoparticles (SiNPs)                                                                              | 0.3 nM<br>0.005 to 10.0 $\mu$ M           | 13            |
| Fluorimetry                            | Hierarchical CdS Spherical Aggregates                                                                                    | 10 nM                                     | 14            |
| Fluorimetry                            | Polydopamine                                                                                                             | 40 nM                                     | 15            |
| Fluorimetry                            | MoS <sub>2</sub> QDNS                                                                                                    | 0.9 nM,<br>2.5 nM- 6 $\mu$ M              | Present study |

**Table S2.** Comparison of various dopamine detection methods.

#### **References:**

- (1) Xu, C.; Tian, M.; Liu, L.; Zou, H.; Zhang, L.; Wang, W. *Journal of The Electrochemical Society* **2012**, 159, D217-D224.
- (2) Wang, L.; Hu, L.; Gao, S.; Zhao, D.; Zhang, L.; Wang, W. *RSC Advances* **2015**, 5, 9314-9324.
- (3) Li, Y.; Liu, M.; Xiang, C.; Xie, Q.; Yao, S. *Thin Solid Films* **2006**, 497, 270-278.
- (4) Bisaglia, M.; Mammi, S.; Bubacco, L. *Journal of Biological Chemistry* **2007**, 282, 15597-15605.
- (5) Ding, Y.; Floren, M.; Tan, W. *Biosurface and Biotribology* **2016**, 2, 121-136.
- (6) Turcheniuk, K.; Tarasevych, A. V.; Kukhar, V. P.; Boukherroub, R.; Szunerits, S. *Nanoscale* **2013**, 5, 10729-10752.

- (7) Palanisamy, S.; Zhang, X.; He, T. *Journal of Materials Chemistry B* **2015**, 3, 6019-6025.
- (8) Jie, Y.; Wang, N.; Cao, X.; Xu, Y.; Li, T.; Zhang, X.; Wang, Z. L. *ACS Nano* **2015**, 9, 8376-8383.
- (9) Kwak, K.; Kumar, S. S.; Lee, D. *Nanoscale* **2012**, 4, 4240-4246.
- (10) Lisdat, F.; Wollenberger, U.; Makower, A.; Hörtnagl, H.; Pfeiffer, D.; Scheller, F. W. *Biosensors and Bioelectronics* **1997**, 12, 1199-1211.
- (11) Njagi, J.; Chernov, M. M.; Leiter, J. C.; Andreescu, S. *Analytical Chemistry* **2010**, 82, 989-996.
- (12) Ban, R.; Abdel-Halim, E. S.; Zhang, J.; Zhu, J.-J. *Analyst* **2015**, 140, 1046-1053.
- (13) Zhang, X.; Chen, X.; Kai, S.; Wang, H.-Y.; Yang, J.; Wu, F.-G.; Chen, Z. *Analytical Chemistry* **2015**, 87, 3360-3365.
- (14) Sun, B.; Wang, C. *Journal of Nanomaterials* **2012**, 2012, 1.
- (15) Yildirim, A.; Bayindir, M. *Analytical Chemistry* **2014**, 86, 5508-5512.
